# Supplementary material for: Strong sexual selection despite spatial constraints on extrapair paternity
Source: Oxford University Press journal article supplement (doi:10.1093/beheco/araa001), 2020-01-14
Supplement: araa001_suppl_supplementary_table_s2.xlsx [file araa001_suppl_supplementary_table_s2.xlsx]

## Sheet: SupplementaryTable1_28Oct2019
Table S2. Selection metrics and extra-pair (EP) outcomes in simulated data across 100 iterations for each set of 15 simulated species and conditions. The association between the male quality trait and copulation success was none (copulation skew = 0), moderate (copulation skew = 3), or strong (copulation skew = 9). EP copulations were unconstrained (U) or constrained to occur within 2.5 territror…
			Selection metrics (mean ± SD; 95% confidence limits)				Per population (mean ± SD)			Per nest with ≥ 1 EPO		Per female-EP male pair (mean ± SD)
Species name, Empirical % EPO	Copulation skew	Spatial constraint	Opportunity for selection	Bateman gradient	s'max	Selection gradient	% EPO	% nests with ≥ 1 EPO	% males siring ≥ 1 EPO	N EP sires per nest (50, 75, 95 percentile)	Distance from EP male to female (mean ± SD)	N EP copulations per pair	N EPO per pair
Banded Wren (Thryophilus pleurostictus), 4% Offspring	0	C	0.23 ± 0.03 (0.16 - 0.29)	0.85 ± 0.21 (0.41 - 1.19)	0.16 ± 0.04 (0.07 - 0.24)	-0.00 ± 0.03 (-0.06 - 0.06)	9.1 ± 1.6	18.8 ± 2.9	9.8 ± 1.5	1, 1, 2	1.4 ± 0.5	1.0 ± 0.1	0.8 ± 0.9
		U	0.22 ± 0.03 (0.17 - 0.28)	0.76 ± 0.22 (0.36 - 1.13)	0.14 ± 0.04 (0.06 - 0.23)	-0.00 ± 0.04 (-0.08 - 0.07)	9.0 ± 1.6	18.9 ± 3.0	8.2 ± 1.3	1, 1, 2	8.9 ± 4.1	1.0 ± 0.0	0.8 ± 0.8
	3	C	0.24 ± 0.04 (0.18 - 0.32)	0.97 ± 0.19 (0.62 - 1.40)	0.21 ± 0.05 (0.12 - 0.33)	0.18 ± 0.04 (0.09 - 0.25)	8.8 ± 1.5	18.6 ± 2.6	9.0 ± 1.2	1, 1, 1	1.5 ± 0.5	1.0 ± 0.1	0.8 ± 0.8
		U	0.24 ± 0.03 (0.19 - 0.30)	0.97 ± 0.18 (0.63 - 1.28)	0.21 ± 0.05 (0.14 - 0.32)	0.19 ± 0.04 (0.12 - 0.26)	9.0 ± 1.5	18.7 ± 2.8	7.9 ± 1.1	1, 1, 2	8.9 ± 4.1	1.0 ± 0.0	0.8 ± 0.8
	9	C	0.38 ± 0.14 (0.21 - 0.77)	0.92 ± 0.19 (0.57 - 1.29)	0.40 ± 0.15 (0.16 - 0.74)	0.23 ± 0.07 (0.09 - 0.36)	9.1 ± 2.5	19.3 ± 4.6	5.6 ± 1.4	1, 1, 1	1.6 ± 0.5	1.1 ± 0.3	0.8 ± 0.9
		U	0.32 ± 0.10 (0.21 - 0.54)	0.83 ± 0.14 (0.60 - 1.07)	0.34 ± 0.12 (0.17 - 0.61)	0.27 ± 0.06 (0.15 - 0.37)	9.1 ± 1.4	19.3 ± 2.8	6.1 ± 1.0	1, 1, 2	8.9 ± 4.0	1.0 ± 0.1	0.8 ± 0.8
Pied Flycatcher (Ficedula hypoleuca), 4.87% Offspring	0	C	0.12 ± 0.02 (0.09 - 0.15)	1.29 ± 0.35 (0.69 - 1.91)	0.12 ± 0.03 (0.06 - 0.17)	-0.00 ± 0.03 (-0.06 - 0.05)	4.8 ± 1.1	12.4 ± 2.5	6.5 ± 1.3	1, 1, 1	1.4 ± 0.5	1.0 ± 0.1	1.3 ± 1.0
		U	0.12 ± 0.01 (0.09 - 0.14)	1.24 ± 0.34 (0.57 - 1.95)	0.11 ± 0.03 (0.05 - 0.18)	-0.00 ± 0.03 (-0.04 - 0.06)	5.0 ± 1.0	12.9 ± 2.4	5.5 ± 1.0	1, 1, 1	8.9 ± 4.0	1.0 ± 0.0	1.3 ± 1.0
	3	C	0.12 ± 0.02 (0.09 - 0.15)	1.37 ± 0.34 (0.78 - 2.06)	0.13 ± 0.04 (0.07 - 0.21)	0.10 ± 0.03 (0.04 - 0.16)	4.7 ± 1.1	12.4 ± 2.5	6.2 ± 1.2	1, 1, 1	1.5 ± 0.5	1.0 ± 0.1	1.3 ± 1.0
		U	0.13 ± 0.02 (0.10 - 0.16)	1.48 ± 0.32 (0.86 - 2.09)	0.15 ± 0.04 (0.09 - 0.21)	0.12 ± 0.03 (0.06 - 0.18)	5.1 ± 1.1	13.0 ± 2.6	5.5 ± 1.1	1, 1, 2	9.0 ± 4.0	1.0 ± 0.0	1.3 ± 1.0
	9	C	0.21 ± 0.09 (0.09 - 0.42)	1.39 ± 0.28 (0.84 - 1.93)	0.30 ± 0.13 (0.08 - 0.55)	0.13 ± 0.06 (0.02 - 0.26)	5.2 ± 1.9	13.3 ± 4.5	3.6 ± 1.2	1, 1, 1	1.6 ± 0.5	1.0 ± 0.2	1.3 ± 1.1
		U	0.17 ± 0.09 (0.10 - 0.41)	1.43 ± 0.34 (0.83 - 2.04)	0.23 ± 0.12 (0.08 - 0.54)	0.17 ± 0.05 (0.10 - 0.30)	5.0 ± 1.2	12.8 ± 2.7	4.2 ± 0.9	1, 1, 1	8.8 ± 4.0	1.0 ± 0.1	1.3 ± 1.0
Great Tit (Parus major), 6.72% Offspring	0	C	0.12 ± 0.02 (0.09 - 0.15)	1.16 ± 0.29 (0.69 - 1.67)	0.11 ± 0.03 (0.06 - 0.17)	-0.00 ± 0.02 (-0.05 - 0.05)	8.0 ± 1.0	28.4 ± 3.2	15.1 ± 1.8	1, 1, 2	1.4 ± 0.5	1.0 ± 0.1	1.2 ± 1.1
		U	0.12 ± 0.01 (0.10 - 0.14)	1.17 ± 0.28 (0.71 - 1.69)	0.12 ± 0.03 (0.07 - 0.17)	0.00 ± 0.03 (-0.05 - 0.05)	7.6 ± 1.0	27.6 ± 2.9	12.3 ± 1.3	1, 1, 2	8.9 ± 4.1	1.0 ± 0.0	1.1 ± 1.0
	3	C	0.13 ± 0.02 (0.10 - 0.16)	1.49 ± 0.24 (1.01 - 2.02)	0.16 ± 0.03 (0.11 - 0.23)	0.15 ± 0.03 (0.09 - 0.19)	7.5 ± 1.1	27.4 ± 3.4	13.3 ± 1.6	1, 1, 2	1.5 ± 0.5	1.0 ± 0.2	1.2 ± 1.1
		U	0.13 ± 0.02 (0.11 - 0.16)	1.44 ± 0.27 (0.99 - 1.98)	0.16 ± 0.03 (0.11 - 0.23)	0.15 ± 0.03 (0.10 - 0.20)	7.6 ± 1.1	27.8 ± 3.5	11.8 ± 1.6	1, 1, 2	8.9 ± 4.0	1.0 ± 0.0	1.1 ± 1.0
	9	C	0.21 ± 0.07 (0.12 - 0.39)	1.45 ± 0.25 (1.04 - 2.02)	0.32 ± 0.10 (0.14 - 0.54)	0.19 ± 0.06 (0.08 - 0.32)	7.8 ± 1.8	28.6 ± 5.7	7.8 ± 1.8	1, 1, 2	1.6 ± 0.5	1.1 ± 0.3	1.3 ± 1.1
		U	0.20 ± 0.08 (0.12 - 0.39)	1.27 ± 0.20 (0.93 - 1.73)	0.30 ± 0.11 (0.13 - 0.53)	0.23 ± 0.05 (0.14 - 0.33)	7.7 ± 1.1	28.1 ± 3.4	8.1 ± 1.4	1, 1, 2	8.9 ± 4.0	1.0 ± 0.1	1.1 ± 1.0
Blue Tit (Cyanistes caeruleus), 13.18% Offspring	0	C	0.11 ± 0.01 (0.09 - 0.15)	1.84 ± 0.26 (1.38 - 2.49)	0.17 ± 0.03 (0.13 - 0.22)	-0.00 ± 0.03 (-0.06 - 0.04)	14.2 ± 1.3	46.1 ± 3.5	24.7 ± 2.0	1, 1, 2	1.5 ± 0.5	1.0 ± 0.2	1.9 ± 1.3
		U	0.11 ± 0.01 (0.09 - 0.14)	1.86 ± 0.26 (1.42 - 2.38)	0.17 ± 0.03 (0.13 - 0.23)	0.00 ± 0.02 (-0.04 - 0.05)	13.8 ± 1.5	45.2 ± 4.0	21.5 ± 1.9	1, 1, 2	8.9 ± 4.0	1.0 ± 0.0	1.8 ± 1.3
	3	C	0.16 ± 0.02 (0.12 - 0.21)	2.51 ± 0.25 (2.03 - 3.01)	0.27 ± 0.04 (0.21 - 0.35)	0.24 ± 0.03 (0.19 - 0.30)	14.2 ± 1.3	46.0 ± 3.4	21.8 ± 1.9	1, 1, 2	1.5 ± 0.5	1.0 ± 0.2	1.9 ± 1.3
		U	0.15 ± 0.02 (0.12 - 0.21)	2.36 ± 0.24 (1.90 - 2.84)	0.27 ± 0.04 (0.21 - 0.35)	0.25 ± 0.03 (0.19 - 0.31)	13.7 ± 1.5	44.6 ± 3.7	19.8 ± 1.7	1, 1, 2	8.8 ± 4.0	1.0 ± 0.0	1.8 ± 1.3
	9	C	0.34 ± 0.12 (0.17 - 0.59)	2.38 ± 0.24 (1.86 - 2.91)	0.49 ± 0.11 (0.31 - 0.71)	0.32 ± 0.07 (0.21 - 0.46)	14.0 ± 2.4	47.0 ± 6.1	12.2 ± 2.1	1, 1, 2	1.6 ± 0.5	1.1 ± 0.4	2.1 ± 1.4
		U	0.37 ± 0.25 (0.15 - 0.99)	2.06 ± 0.22 (1.63 - 2.48)	0.51 ± 0.19 (0.26 - 0.95)	0.38 ± 0.08 (0.27 - 0.51)	13.8 ± 1.5	45.3 ± 4.0	12.2 ± 1.9	1, 1, 2	9.0 ± 4.0	1.0 ± 0.1	1.8 ± 1.3
House Wren (Troglodytes aedon), 13.5% Offspring	0	C	0.18 ± 0.02 (0.13 - 0.22)	0.87 ± 0.18 (0.50 - 1.23)	0.16 ± 0.03 (0.10 - 0.24)	-0.01 ± 0.04 (-0.07 - 0.06)	14.3 ± 1.5	38.7 ± 3.4	20.4 ± 1.7	1, 1, 2	1.5 ± 0.5	1.0 ± 0.2	0.9 ± 0.9
		U	0.18 ± 0.02 (0.15 - 0.22)	0.87 ± 0.16 (0.52 - 1.12)	0.16 ± 0.03 (0.10 - 0.21)	0.00 ± 0.03 (-0.06 - 0.07)	14.2 ± 1.6	38.8 ± 3.9	17.8 ± 1.7	1, 1, 2	8.9 ± 4.0	1.0 ± 0.0	0.8 ± 0.9
	3	C	0.22 ± 0.03 (0.16 - 0.27)	1.17 ± 0.16 (0.88 - 1.48)	0.26 ± 0.04 (0.17 - 0.34)	0.24 ± 0.04 (0.15 - 0.29)	14.2 ± 1.6	38.5 ± 3.7	18.4 ± 1.9	1, 1, 2	1.5 ± 0.5	1.0 ± 0.2	0.9 ± 0.9
		U	0.22 ± 0.03 (0.17 - 0.29)	1.11 ± 0.15 (0.82 - 1.38)	0.27 ± 0.04 (0.20 - 0.36)	0.25 ± 0.04 (0.18 - 0.34)	14.3 ± 1.7	38.9 ± 3.5	16.6 ± 1.5	1, 1, 2	8.9 ± 4.0	1.0 ± 0.0	0.8 ± 0.9
	9	C	0.42 ± 0.14 (0.23 - 0.71)	1.16 ± 0.19 (0.83 - 1.53)	0.50 ± 0.12 (0.30 - 0.74)	0.33 ± 0.07 (0.21 - 0.47)	14.7 ± 2.5	40.1 ± 5.3	11.5 ± 1.7	1, 1, 2	1.6 ± 0.5	1.2 ± 0.4	1.0 ± 1.0
		U	0.48 ± 0.39 (0.21 - 1.19)	0.93 ± 0.12 (0.74 - 1.21)	0.53 ± 0.23 (0.25 - 1.03)	0.39 ± 0.09 (0.24 - 0.57)	14.1 ± 1.8	38.2 ± 4.3	10.5 ± 1.7	1, 1, 2	9.0 ± 4.0	1.0 ± 0.1	0.8 ± 0.9
House Martin (Delichon urbica), 13.8% Offspring	0	C	0.19 ± 0.03 (0.14 - 0.24)	0.70 ± 0.12 (0.44 - 0.95)	0.18 ± 0.03 (0.12 - 0.24)	0.00 ± 0.03 (-0.06 - 0.06)	16.5 ± 1.8	37.1 ± 3.9	19.2 ± 1.9	1, 1, 2	1.5 ± 0.5	1.0 ± 0.2	0.7 ± 0.8
		U	0.19 ± 0.02 (0.15 - 0.24)	0.65 ± 0.12 (0.43 - 0.89)	0.17 ± 0.03 (0.11 - 0.25)	-0.00 ± 0.03 (-0.05 - 0.05)	15.7 ± 1.8	35.6 ± 3.7	15.9 ± 1.6	1, 1, 2	8.9 ± 4.0	1.0 ± 0.0	0.6 ± 0.7
	3	C	0.25 ± 0.03 (0.19 - 0.32)	0.93 ± 0.13 (0.70 - 1.19)	0.30 ± 0.04 (0.24 - 0.40)	0.27 ± 0.03 (0.20 - 0.35)	16.4 ± 1.9	36.7 ± 3.4	17.1 ± 1.8	1, 1, 2	1.5 ± 0.5	1.1 ± 0.2	0.7 ± 0.8
		U	0.25 ± 0.03 (0.18 - 0.32)	0.85 ± 0.09 (0.68 - 1.02)	0.30 ± 0.04 (0.22 - 0.38)	0.28 ± 0.04 (0.21 - 0.34)	16.3 ± 2.1	36.4 ± 4.2	15.5 ± 1.8	1, 1, 2	9.0 ± 4.0	1.0 ± 0.0	0.6 ± 0.8
	9	C	0.50 ± 0.19 (0.27 - 0.96)	0.93 ± 0.15 (0.69 - 1.26)	0.56 ± 0.15 (0.33 - 0.87)	0.37 ± 0.09 (0.24 - 0.53)	16.8 ± 2.9	38.0 ± 5.3	10.9 ± 1.6	1, 1, 2	1.6 ± 0.5	1.2 ± 0.5	0.8 ± 0.8
		U	0.52 ± 0.28 (0.23 - 1.11)	0.73 ± 0.10 (0.52 - 0.96)	0.57 ± 0.20 (0.28 - 0.97)	0.42 ± 0.08 (0.28 - 0.60)	16.2 ± 1.9	36.3 ± 3.6	9.9 ± 1.2	1, 1, 2	9.0 ± 4.0	1.0 ± 0.1	0.7 ± 0.8
Winter Wren (Troglodytes troglodytes), 16.3% Offspring	0	C	0.20 ± 0.03 (0.16 - 0.25)	1.22 ± 0.24 (0.77 - 1.69)	0.19 ± 0.04 (0.12 - 0.29)	0.00 ± 0.03 (-0.06 - 0.06)	16.8 ± 1.9	43.1 ± 3.6	22.8 ± 2.0	1, 1, 2	1.4 ± 0.5	1.0 ± 0.2	1.2 ± 1.1
		U	0.20 ± 0.03 (0.15 - 0.25)	1.18 ± 0.21 (0.77 - 1.56)	0.19 ± 0.04 (0.12 - 0.27)	0.00 ± 0.03 (-0.07 - 0.06)	16.8 ± 1.8	42.8 ± 3.7	19.9 ± 1.8	1, 1, 2	9.0 ± 4.1	1.0 ± 0.0	1.2 ± 1.0
	3	C	0.25 ± 0.03 (0.20 - 0.31)	1.66 ± 0.21 (1.29 - 2.10)	0.31 ± 0.05 (0.23 - 0.40)	0.28 ± 0.04 (0.20 - 0.37)	16.3 ± 1.7	42.0 ± 3.7	19.8 ± 1.8	1, 1, 2	1.5 ± 0.5	1.0 ± 0.2	1.2 ± 1.1
		U	0.25 ± 0.04 (0.19 - 0.34)	1.53 ± 0.22 (1.11 - 1.93)	0.31 ± 0.05 (0.21 - 0.41)	0.28 ± 0.04 (0.20 - 0.36)	16.1 ± 1.7	41.7 ± 3.6	17.9 ± 1.6	1, 1, 2	8.9 ± 4.0	1.0 ± 0.0	1.2 ± 1.0
	9	C	0.52 ± 0.17 (0.28 - 0.85)	1.62 ± 0.21 (1.22 - 2.00)	0.59 ± 0.13 (0.38 - 0.82)	0.38 ± 0.08 (0.26 - 0.53)	16.8 ± 2.7	43.2 ± 5.3	11.7 ± 1.8	1, 1, 2	1.6 ± 0.5	1.2 ± 0.4	1.4 ± 1.2
		U	0.57 ± 0.26 (0.28 - 1.25)	1.33 ± 0.16 (1.05 - 1.68)	0.62 ± 0.19 (0.31 - 1.04)	0.45 ± 0.08 (0.31 - 0.60)	16.5 ± 1.7	42.3 ± 3.4	11.3 ± 1.7	1, 1, 2	8.9 ± 4.0	1.0 ± 0.1	1.2 ± 1.1
Collared Flycatcher (Ficedula albicollis), 20.51% Offspring	0	C	0.14 ± 0.02 (0.11 - 0.17)	1.50 ± 0.17 (1.17 - 1.81)	0.22 ± 0.03 (0.16 - 0.26)	-0.01 ± 0.03 (-0.06 - 0.05)	21.4 ± 2.1	56.4 ± 4.4	30.2 ± 2.3	1, 2, 2	1.5 ± 0.5	1.0 ± 0.2	1.5 ± 1.1
		U	0.13 ± 0.02 (0.11 - 0.17)	1.44 ± 0.19 (1.12 - 1.84)	0.22 ± 0.03 (0.17 - 0.27)	0.00 ± 0.03 (-0.05 - 0.06)	21.3 ± 1.7	56.4 ± 3.6	27.6 ± 1.9	1, 2, 2	8.9 ± 4.0	1.0 ± 0.0	1.4 ± 1.1
	3	C	0.23 ± 0.04 (0.17 - 0.31)	2.09 ± 0.16 (1.79 - 2.37)	0.39 ± 0.04 (0.31 - 0.47)	0.34 ± 0.04 (0.26 - 0.42)	21.6 ± 1.6	57.4 ± 3.2	26.3 ± 1.8	1, 2, 2	1.5 ± 0.5	1.1 ± 0.2	1.5 ± 1.1
		U	0.23 ± 0.03 (0.18 - 0.31)	1.93 ± 0.15 (1.67 - 2.26)	0.39 ± 0.04 (0.32 - 0.48)	0.35 ± 0.03 (0.28 - 0.41)	21.5 ± 1.9	56.7 ± 3.7	24.6 ± 1.9	1, 2, 2	8.9 ± 4.0	1.0 ± 0.1	1.4 ± 1.1
	9	C	0.56 ± 0.19 (0.31 - 0.98)	2.10 ± 0.19 (1.80 - 2.49)	0.68 ± 0.13 (0.47 - 0.93)	0.47 ± 0.08 (0.33 - 0.63)	22.1 ± 2.7	58.9 ± 4.4	16.1 ± 2.1	1, 1, 2	1.6 ± 0.5	1.2 ± 0.5	1.7 ± 1.2
		U	0.85 ± 0.98 (0.26 - 3.19)	1.65 ± 0.14 (1.39 - 1.92)	0.81 ± 0.35 (0.43 - 1.77)	0.56 ± 0.12 (0.40 - 0.84)	21.7 ± 1.8	56.5 ± 3.7	14.8 ± 2.4	1, 2, 2	9.0 ± 4.1	1.0 ± 0.1	1.5 ± 1.1
Bluethroat (Luscinia svecica),23.6 % Offspring	0	C	0.25 ± 0.03 (0.19 - 0.30)	1.97 ± 0.25 (1.50 - 2.46)	0.29 ± 0.04 (0.22 - 0.37)	0.00 ± 0.04 (-0.08 - 0.08)	24.8 ± 2.1	47.0 ± 3.5	25.2 ± 2.0	1, 1, 2	1.4 ± 0.5	1.0 ± 0.2	2.0 ± 1.3
		U	0.25 ± 0.03 (0.19 - 0.30)	1.91 ± 0.22 (1.47 - 2.34)	0.29 ± 0.03 (0.22 - 0.36)	0.00 ± 0.04 (-0.08 - 0.08)	24.7 ± 2.5	47.4 ± 4.2	22.2 ± 2.0	1, 1, 2	8.9 ± 4.0	1.0 ± 0.0	1.9 ± 1.3
	3	C	0.38 ± 0.06 (0.30 - 0.52)	2.64 ± 0.20 (2.28 - 3.04)	0.48 ± 0.06 (0.38 - 0.61)	0.42 ± 0.05 (0.35 - 0.52)	24.8 ± 2.2	47.6 ± 3.2	21.9 ± 1.7	1, 1, 2	1.5 ± 0.5	1.0 ± 0.2	2.0 ± 1.3
		U	0.39 ± 0.06 (0.28 - 0.49)	2.51 ± 0.22 (2.01 - 2.88)	0.48 ± 0.06 (0.38 - 0.59)	0.44 ± 0.04 (0.36 - 0.52)	24.9 ± 2.5	47.6 ± 3.8	20.5 ± 1.6	1, 1, 2	8.9 ± 4.0	1.0 ± 0.0	1.9 ± 1.3
	9	C	0.91 ± 0.34 (0.40 - 1.58)	2.52 ± 0.22 (2.14 - 3.07)	0.85 ± 0.19 (0.54 - 1.18)	0.55 ± 0.11 (0.33 - 0.74)	25.1 ± 4.1	48.4 ± 6.3	12.9 ± 2.2	1, 1, 2	1.6 ± 0.5	1.1 ± 0.4	2.2 ± 1.3
		U	1.11 ± 1.53 (0.46 - 2.34)	2.14 ± 0.19 (1.80 - 2.51)	0.90 ± 0.39 (0.54 - 1.48)	0.66 ± 0.15 (0.50 - 0.89)	24.8 ± 2.2	47.4 ± 3.7	12.9 ± 1.9	1, 1, 2	8.9 ± 4.0	1.0 ± 0.1	1.9 ± 1.3
Hooded Warbler (Wilsonia citrina), 27.1% Offspring	0	C	0.43 ± 0.06 (0.34 - 0.55)	1.75 ± 0.23 (1.38 - 2.18)	0.39 ± 0.06 (0.30 - 0.51)	0.00 ± 0.05 (-0.11 - 0.10)	27.2 ± 2.8	36.2 ± 3.3	18.5 ± 1.8	1, 1, 2	1.4 ± 0.5	1.0 ± 0.1	1.7 ± 1.1
		U	0.43 ± 0.06 (0.33 - 0.55)	1.69 ± 0.22 (1.24 - 2.09)	0.39 ± 0.05 (0.28 - 0.50)	0.00 ± 0.05 (-0.10 - 0.09)	27.3 ± 2.8	36.5 ± 3.4	16.2 ± 1.5	1, 1, 2	8.9 ± 4.0	1.0 ± 0.0	1.7 ± 1.1
	3	C	0.58 ± 0.08 (0.45 - 0.76)	2.19 ± 0.20 (1.84 - 2.63)	0.56 ± 0.07 (0.45 - 0.69)	0.48 ± 0.06 (0.36 - 0.59)	27.0 ± 2.9	36.1 ± 3.4	16.8 ± 1.7	1, 1, 2	1.5 ± 0.5	1.0 ± 0.2	1.8 ± 1.1
		U	0.59 ± 0.07 (0.44 - 0.74)	2.14 ± 0.18 (1.78 - 2.50)	0.57 ± 0.06 (0.47 - 0.68)	0.50 ± 0.05 (0.40 - 0.58)	26.7 ± 2.9	35.9 ± 3.5	14.9 ± 1.6	1, 1, 2	8.9 ± 4.0	1.0 ± 0.0	1.7 ± 1.1
	9	C	1.38 ± 0.46 (0.64 - 2.40)	2.05 ± 0.23 (1.65 - 2.47)	1.04 ± 0.22 (0.63 - 1.47)	0.64 ± 0.14 (0.35 - 0.90)	27.8 ± 5.7	37.2 ± 7.5	9.5 ± 2.0	1, 1, 2	1.6 ± 0.5	1.1 ± 0.3	1.9 ± 1.1
		U	1.32 ± 0.71 (0.64 - 2.91)	1.89 ± 0.22 (1.52 - 2.27)	0.98 ± 0.30 (0.58 - 1.62)	0.75 ± 0.12 (0.56 - 1.00)	26.6 ± 3.1	35.4 ± 3.7	9.9 ± 1.4	1, 1, 2	8.9 ± 4.0	1.0 ± 0.1	1.7 ± 1.1
Willow Warbler (Phylloscopus trochilus), 33.1% Offspring	0	C	0.29 ± 0.04 (0.23 - 0.38)	2.19 ± 0.23 (1.73 - 2.59)	0.35 ± 0.04 (0.28 - 0.43)	-0.00 ± 0.04 (-0.08 - 0.08)	33.9 ± 2.6	59.1 ± 3.8	31.9 ± 2.2	1, 2, 2	1.5 ± 0.5	1.0 ± 0.2	2.2 ± 1.4
		U	0.29 ± 0.03 (0.23 - 0.35)	2.07 ± 0.23 (1.64 - 2.48)	0.35 ± 0.04 (0.29 - 0.41)	0.00 ± 0.04 (-0.08 - 0.08)	33.7 ± 2.4	59.2 ± 3.7	29.5 ± 2.0	1, 2, 3	8.9 ± 4.0	1.0 ± 0.0	2.1 ± 1.3
	3	C	0.52 ± 0.07 (0.40 - 0.65)	2.99 ± 0.22 (2.61 - 3.39)	0.61 ± 0.06 (0.50 - 0.71)	0.51 ± 0.05 (0.43 - 0.60)	33.6 ± 2.4	59.2 ± 3.2	27.2 ± 1.8	1, 2, 2	1.5 ± 0.5	1.1 ± 0.2	2.2 ± 1.4
		U	0.53 ± 0.09 (0.38 - 0.71)	2.77 ± 0.15 (2.47 - 3.05)	0.61 ± 0.07 (0.50 - 0.73)	0.53 ± 0.06 (0.42 - 0.63)	34.3 ± 2.6	59.6 ± 3.6	26.8 ± 1.6	1, 2, 3	8.9 ± 4.0	1.0 ± 0.0	2.1 ± 1.3
	9	C	1.35 ± 0.39 (0.74 - 2.16)	2.92 ± 0.19 (2.59 - 3.26)	1.08 ± 0.18 (0.78 - 1.42)	0.75 ± 0.11 (0.57 - 0.96)	35.3 ± 4.1	61.8 ± 5.5	16.1 ± 2.0	1, 1, 2	1.6 ± 0.5	1.2 ± 0.5	2.5 ± 1.4
		U	2.22 ± 1.88 (0.71 - 6.60)	2.36 ± 0.20 (2.01 - 2.72)	1.34 ± 0.53 (0.72 - 2.55)	0.89 ± 0.18 (0.63 - 1.28)	34.2 ± 2.5	59.7 ± 3.5	15.1 ± 2.2	1, 2, 3	8.8 ± 4.0	1.0 ± 0.1	2.2 ± 1.3
Yellow Warbler (Setophaga petechia), 33.7% Offspring	0	C	0.29 ± 0.04 (0.23 - 0.36)	1.46 ± 0.17 (1.11 - 1.77)	0.33 ± 0.04 (0.24 - 0.41)	0.00 ± 0.04 (-0.10 - 0.08)	34.1 ± 2.4	60.8 ± 3.6	31.9 ± 1.9	1, 2, 2	1.4 ± 0.5	1.0 ± 0.2	1.4 ± 1.1
		U	0.30 ± 0.04 (0.24 - 0.36)	1.41 ± 0.15 (1.09 - 1.71)	0.33 ± 0.04 (0.27 - 0.41)	0.00 ± 0.04 (-0.07 - 0.07)	34.6 ± 2.5	61.6 ± 3.9	29.6 ± 1.9	1, 2, 2	8.9 ± 4.0	1.0 ± 0.0	1.4 ± 1.1
	3	C	0.51 ± 0.07 (0.38 - 0.65)	2.01 ± 0.15 (1.75 - 2.35)	0.59 ± 0.06 (0.48 - 0.70)	0.50 ± 0.05 (0.39 - 0.60)	34.4 ± 2.2	61.3 ± 3.4	27.6 ± 2.0	1, 2, 2	1.5 ± 0.5	1.1 ± 0.3	1.5 ± 1.1
		U	0.53 ± 0.08 (0.38 - 0.70)	1.86 ± 0.13 (1.62 - 2.10)	0.60 ± 0.06 (0.48 - 0.72)	0.53 ± 0.05 (0.43 - 0.62)	34.4 ± 2.7	61.4 ± 3.6	26.4 ± 1.9	1, 2, 2	8.9 ± 4.0	1.0 ± 0.0	1.4 ± 1.1
	9	C	1.38 ± 0.46 (0.73 - 2.30)	2.02 ± 0.17 (1.76 - 2.37)	1.08 ± 0.20 (0.76 - 1.46)	0.74 ± 0.11 (0.56 - 0.96)	35.7 ± 3.5	63.4 ± 4.3	16.5 ± 2.2	1, 1, 2	1.6 ± 0.5	1.2 ± 0.5	1.7 ± 1.1
		U	1.77 ± 1.07 (0.74 - 4.54)	1.60 ± 0.15 (1.37 - 1.87)	1.21 ± 0.36 (0.76 - 2.10)	0.84 ± 0.15 (0.60 - 1.20)	34.5 ± 2.3	61.5 ± 3.7	15.3 ± 2.2	1, 2, 2	8.9 ± 4.0	1.0 ± 0.1	1.4 ± 1.1
Black-throated Blue Warbler (Setophaga caerulescens), 35% Offspring	0	C	0.39 ± 0.05 (0.29 - 0.48)	1.61 ± 0.17 (1.23 - 1.87)	0.40 ± 0.05 (0.32 - 0.49)	-0.00 ± 0.05 (-0.11 - 0.08)	41.8 ± 3.0	61.6 ± 3.6	32.1 ± 1.9	1, 2, 2	1.5 ± 0.5	1.0 ± 0.2	1.6 ± 1.1
		U	0.41 ± 0.04 (0.34 - 0.49)	1.55 ± 0.15 (1.27 - 1.83)	0.41 ± 0.04 (0.33 - 0.50)	0.00 ± 0.05 (-0.10 - 0.10)	41.9 ± 3.1	61.4 ± 3.8	29.4 ± 2.1	1, 2, 2	8.9 ± 4.0	1.0 ± 0.0	1.6 ± 1.1
	3	C	0.71 ± 0.10 (0.53 - 0.96)	2.22 ± 0.14 (1.95 - 2.48)	0.71 ± 0.07 (0.57 - 0.86)	0.60 ± 0.06 (0.48 - 0.72)	41.6 ± 2.3	61.4 ± 2.7	27.4 ± 1.6	1, 2, 2	1.5 ± 0.5	1.1 ± 0.2	1.7 ± 1.1
		U	0.75 ± 0.11 (0.57 - 0.98)	2.08 ± 0.15 (1.79 - 2.35)	0.74 ± 0.07 (0.61 - 0.89)	0.63 ± 0.06 (0.52 - 0.76)	41.4 ± 3.2	61.0 ± 3.9	26.2 ± 2.1	1, 2, 2	8.9 ± 4.0	1.0 ± 0.0	1.6 ± 1.1
	9	C	1.89 ± 0.56 (0.97 - 3.21)	2.26 ± 0.16 (1.98 - 2.55)	1.28 ± 0.21 (0.89 - 1.73)	0.89 ± 0.14 (0.63 - 1.15)	43.3 ± 4.8	63.8 ± 5.4	16.4 ± 2.0	1, 1, 2	1.6 ± 0.5	1.2 ± 0.5	1.9 ± 1.1
		U	2.67 ± 2.27 (1.00 - 7.72)	1.80 ± 0.14 (1.57 - 2.10)	1.48 ± 0.51 (0.88 - 2.74)	1.02 ± 0.20 (0.77 - 1.48)	41.6 ± 2.9	61.5 ± 3.9	15.2 ± 2.2	1, 2, 2	9.0 ± 4.0	1.0 ± 0.1	1.6 ± 1.1
Tree Swallow (Tachycineta bicolor), 47.9% Offspring	0	C	0.29 ± 0.03 (0.23 - 0.34)	1.42 ± 0.16 (1.12 - 1.70)	0.33 ± 0.04 (0.24 - 0.40)	0.01 ± 0.04 (-0.07 - 0.08)	48.9 ± 2.2	83.9 ± 2.6	46.6 ± 2.2	2, 2, 3	1.5 ± 0.5	1.1 ± 0.3	1.4 ± 1.1
		U	0.29 ± 0.03 (0.24 - 0.38)	1.34 ± 0.14 (1.09 - 1.59)	0.34 ± 0.04 (0.27 - 0.42)	0.00 ± 0.04 (-0.09 - 0.08)	48.9 ± 2.1	83.8 ± 2.7	46.9 ± 2.2	2, 2, 3	8.9 ± 4.0	1.0 ± 0.0	1.3 ± 1.1
	3	C	0.64 ± 0.10 (0.48 - 0.89)	2.05 ± 0.13 (1.81 - 2.28)	0.70 ± 0.07 (0.58 - 0.85)	0.59 ± 0.07 (0.47 - 0.74)	48.9 ± 2.1	83.9 ± 2.9	38.7 ± 2.3	2, 2, 3	1.5 ± 0.5	1.1 ± 0.4	1.5 ± 1.2
		U	0.69 ± 0.12 (0.51 - 0.94)	1.76 ± 0.12 (1.57 - 2.00)	0.73 ± 0.08 (0.61 - 0.89)	0.62 ± 0.06 (0.51 - 0.74)	49.1 ± 2.4	84.3 ± 2.7	40.1 ± 2.4	2, 2, 3	8.8 ± 4.0	1.0 ± 0.1	1.3 ± 1.1
	9	C	1.84 ± 0.44 (1.13 - 2.83)	2.31 ± 0.20 (1.97 - 2.73)	1.28 ± 0.16 (0.99 - 1.61)	0.90 ± 0.11 (0.69 - 1.12)	49.9 ± 2.5	85.2 ± 2.7	23.3 ± 2.7	1, 2, 3	1.6 ± 0.5	1.3 ± 0.7	1.8 ± 1.3
		U	3.58 ± 2.28 (1.31 - 9.10)	1.56 ± 0.11 (1.37 - 1.77)	1.78 ± 0.52 (1.08 - 3.00)	1.10 ± 0.20 (0.81 - 1.57)	49.3 ± 2.2	84.3 ± 2.7	21.0 ± 3.1	2, 2, 3	8.9 ± 4.0	1.0 ± 0.2	1.4 ± 1.1
Reed Bunting (Emberiza schoeniclus), 52.4% Offspring	0	C	0.46 ± 0.06 (0.37 - 0.55)	1.70 ± 0.17 (1.39 - 2.00)	0.44 ± 0.05 (0.34 - 0.52)	0.00 ± 0.05 (-0.11 - 0.08)	52.7 ± 2.9	73.0 ± 3.3	38.9 ± 2.0	1, 2, 3	1.5 ± 0.5	1.1 ± 0.2	1.7 ± 1.2
		U	0.48 ± 0.06 (0.37 - 0.59)	1.61 ± 0.17 (1.23 - 1.89)	0.45 ± 0.05 (0.35 - 0.54)	-0.01 ± 0.05 (-0.11 - 0.08)	52.8 ± 2.8	73.0 ± 3.6	37.5 ± 2.2	1, 2, 3	8.9 ± 4.0	1.0 ± 0.0	1.6 ± 1.2
	3	C	0.93 ± 0.13 (0.72 - 1.22)	2.33 ± 0.15 (2.05 - 2.63)	0.83 ± 0.08 (0.70 - 1.00)	0.69 ± 0.07 (0.58 - 0.83)	52.9 ± 2.3	73.3 ± 3.0	33.0 ± 2.2	1, 2, 3	1.5 ± 0.5	1.1 ± 0.3	1.7 ± 1.2
		U	0.95 ± 0.13 (0.72 - 1.21)	2.15 ± 0.15 (1.87 - 2.43)	0.85 ± 0.08 (0.71 - 1.00)	0.70 ± 0.07 (0.56 - 0.82)	53.2 ± 3.0	73.2 ± 3.5	33.0 ± 2.0	1, 2, 3	8.9 ± 4.0	1.0 ± 0.1	1.6 ± 1.2
	9	C	2.37 ± 0.51 (1.56 - 3.43)	2.47 ± 0.18 (2.13 - 2.79)	1.45 ± 0.17 (1.16 - 1.76)	1.03 ± 0.10 (0.86 - 1.22)	53.1 ± 3.4	73.2 ± 3.0	19.6 ± 2.3	1, 2, 2	1.6 ± 0.5	1.3 ± 0.6	2.0 ± 1.3
		U	4.13 ± 2.37 (1.70 - 10.85)	1.87 ± 0.16 (1.60 - 2.23)	1.91 ± 0.51 (1.15 - 3.27)	1.22 ± 0.18 (0.93 - 1.66)	53.0 ± 3.3	73.1 ± 3.2	18.0 ± 2.5	1, 2, 3	8.9 ± 4.0	1.0 ± 0.2	1.6 ± 1.2
